# Supplementary material for: Phytochrome-Dependent Regulation of ZFP6 and ZFPH Impacts Photomorphogenesis in Arabidopsis thaliana
Source: Front Plant Sci. 2022 Jun 1;13:846262. doi: 10.3389/fpls.2022.846262 (PMC9198550; doi:10.3389/fpls.2022.846262)
Supplement: Supplementary file 2 [file Table_2.xlsx]

## Sheet: Light-responsive genes
Supplemental Table S2. Analysis of genes that codify for proteins that may bind to ZFP6 and ZFPH genes
Light-Responsive Genes
GI
AT1G01010
AT1G01030
AT1G01070
AT1G01080
AT1G01340
AT1G01390
AT1G01420
AT1G01430
AT1G01580
AT1G01600
AT1G01610
AT1G01640
AT1G01780
AT1G01790
AT1G02205
AT1G02220
AT1G02230
AT1G02340
AT1G02360
AT1G02380
AT1G02400
AT1G02475
AT1G02580
AT1G02670
AT1G02710
AT1G02800
AT1G02810
AT1G02820
AT1G02900
AT1G03010
AT1G03106
AT1G03130
AT1G03290
AT1G03300
AT1G03310
AT1G03340
AT1G03440
AT1G03445
AT1G03600
AT1G03630
AT1G03680
AT1G03790
AT1G03800
AT1G03820
AT1G04110
AT1G04220
AT1G04250
AT1G04310
AT1G04610
AT1G04660
AT1G04800
AT1G05200
AT1G05260
AT1G05300
AT1G05420
AT1G05490
AT1G05560
AT1G05562
AT1G05570
AT1G05690
AT1G05700
AT1G05835
AT1G05950
AT1G06080
AT1G06090
AT1G06160
AT1G06420
AT1G06520
AT1G06645
AT1G06680
AT1G06830
AT1G06930
AT1G07000
AT1G07010
AT1G07050
AT1G07090
AT1G07150
AT1G07180
AT1G07280
AT1G07320
AT1G07400
AT1G07490
AT1G07550
AT1G07560
AT1G07590
AT1G07600
AT1G07610
AT1G07690
AT1G07700
AT1G07730
AT1G07985
AT1G08310
AT1G08320
AT1G08380
AT1G08390
AT1G08465
AT1G08500
AT1G08630
AT1G08670
AT1G09080
AT1G09155
AT1G09310
AT1G09340
AT1G09440
AT1G09480
AT1G09530
AT1G09740
AT1G09750
AT1G09795
AT1G09932
AT1G10060
AT1G10140
AT1G10360
AT1G10370
AT1G10400
AT1G10480
AT1G10550
AT1G10560
AT1G10640
AT1G11130
AT1G11175
AT1G11185
AT1G11330
AT1G11340
AT1G11350
AT1G11540
AT1G11700
AT1G11720
AT1G11790
AT1G11850
AT1G12010
AT1G12070
AT1G12080
AT1G12160
AT1G12240
AT1G12280
AT1G12330
AT1G12420
AT1G12460
AT1G12800
AT1G12860
AT1G12900
AT1G13030
AT1G13130
AT1G13270
AT1G13430
AT1G13530
AT1G13590
AT1G13600
AT1G13635
AT1G13790
AT1G13820
AT1G13930
AT1G13950
AT1G14040
AT1G14160
AT1G14200
AT1G14270
AT1G14345
AT1G14370
AT1G14410
AT1G14430
AT1G14580
AT1G14700
AT1G14810
AT1G14840
AT1G14860
AT1G14870
AT1G14930
AT1G14970
AT1G15000
AT1G15010
AT1G15040
AT1G15125
AT1G15140
AT1G15190
AT1G15210
AT1G15260
AT1G15390
AT1G15480
AT1G15640
AT1G15670
AT1G15730
AT1G15820
AT1G15825
AT1G15830
AT1G15980
AT1G16030
AT1G16120
AT1G16130
AT1G16370
AT1G16500
AT1G16720
AT1G16750
AT1G16850
AT1G16960
AT1G17020
AT1G17060
AT1G17140
AT1G17300
AT1G17345
AT1G17420
AT1G17430
AT1G17560
AT1G17650
AT1G17960
AT1G18060
AT1G18170
AT1G18200
AT1G18280
AT1G18290
AT1G18330
AT1G18400
AT1G18730
AT1G18773
AT1G18810
AT1G18835
AT1G18860
AT1G18870
AT1G18970
AT1G19150
AT1G19350
AT1G19510
AT1G19530
AT1G19620
AT1G19650
AT1G19670
AT1G19740
AT1G19830
AT1G19950
AT1G20020
AT1G20160
AT1G20330
AT1G20340
AT1G20400
AT1G20520
AT1G20700
AT1G20810
AT1G20823
AT1G20900
AT1G21110
AT1G21130
AT1G21210
AT1G21270
AT1G21350
AT1G21360
AT1G21400
AT1G21410
AT1G21440
AT1G21500
AT1G21540
AT1G21560
AT1G21810
AT1G21910
AT1G21920
AT1G21980
AT1G22065
AT1G22160
AT1G22275
AT1G22370
AT1G22400
AT1G22440
AT1G22590
AT1G22630
AT1G22650
AT1G22710
AT1G22900
AT1G23010
AT1G23040
AT1G23060
AT1G23100
AT1G23120
AT1G23130
AT1G23310
AT1G23340
AT1G23380
AT1G23740
AT1G23760
AT1G24020
AT1G24260
AT1G24320
AT1G24400
AT1G24577
AT1G25440
AT1G25460
AT1G25560
AT1G26150
AT1G26200
AT1G26210
AT1G26250
AT1G26270
AT1G26380
AT1G26390
AT1G26540
AT1G26600
AT1G26770
AT1G26780
AT1G26945
AT1G27030
AT1G27110
AT1G27460
AT1G27620
AT1G27670
AT1G27680
AT1G27980
AT1G28080
AT1G28230
AT1G28330
AT1G28570
AT1G28600
AT1G28815
AT1G29020
AT1G29025
AT1G29050
AT1G29070
AT1G29090
AT1G29110
AT1G29160
AT1G29179
AT1G29180
AT1G29280
AT1G29390
AT1G29395
AT1G29490
AT1G29530
AT1G29560
AT1G29660
AT1G29700
AT1G29840
AT1G29910
AT1G29920
AT1G30080
AT1G30210
AT1G30220
AT1G30280
AT1G30282
AT1G30360
AT1G30380
AT1G30510
AT1G30520
AT1G30530
AT1G30560
AT1G30650
AT1G30730
AT1G30750
AT1G30760
AT1G30900
AT1G30935
AT1G31040
AT1G31150
AT1G31160
AT1G31310
AT1G31330
AT1G31335
AT1G31350
AT1G31550
AT1G31580
AT1G31650
AT1G31750
AT1G31760
AT1G31800
AT1G31850
AT1G31860
AT1G31920
AT1G32060
AT1G32080
AT1G32170
AT1G32190
AT1G32200
AT1G32220
AT1G32470
AT1G32520
AT1G32540
AT1G32550
AT1G32640
AT1G32900
AT1G32990
AT1G33030
AT1G33110
AT1G33340
AT1G33480
AT1G33590
AT1G33600
AT1G33790
AT1G33800
AT1G33811
AT1G33813
AT1G33817
AT1G34000
AT1G34065
AT1G34110
AT1G34180
AT1G34245
AT1G34340
AT1G34510
AT1G34630
AT1G34670
AT1G35140
AT1G35560
AT1G35680
AT1G36060
AT1G36640
AT1G37130
AT1G42430
AT1G42470
AT1G42970
AT1G43020
AT1G43140
AT1G43560
AT1G44000
AT1G44050
AT1G44160
AT1G44446
AT1G44575
AT1G44830
AT1G44920
AT1G44970
AT1G45010
AT1G45130
AT1G45191
AT1G45201
AT1G45474
AT1G46264
AT1G47270
AT1G47395
AT1G47960
AT1G48260
AT1G48350
AT1G48500
AT1G48520
AT1G48570
AT1G48640
AT1G48690
AT1G48700
AT1G49010
AT1G49130
AT1G49210
AT1G49230
AT1G49380
AT1G49430
AT1G49450
AT1G49570
AT1G49750
AT1G49860
AT1G49870
AT1G49910
AT1G49975
AT1G50090
AT1G50250
AT1G50270
AT1G50280
AT1G50420
AT1G50560
AT1G50732
AT1G50900
AT1G50910
AT1G51100
AT1G51110
AT1G51400
AT1G51402
AT1G51405
AT1G51420
AT1G51580
AT1G51700
AT1G51790
AT1G51805
AT1G51830
AT1G51840
AT1G51850
AT1G51860
AT1G51870
AT1G51880
AT1G52000
AT1G52100
AT1G52220
AT1G52230
AT1G52240
AT1G52290
AT1G52330
AT1G52342
AT1G52343
AT1G52400
AT1G52510
AT1G52660
AT1G52670
AT1G52750
AT1G52855
AT1G52870
AT1G52890
AT1G53070
AT1G53080
AT1G53180
AT1G53230
AT1G53233
AT1G53340
AT1G53520
AT1G53540
AT1G53680
AT1G53690
AT1G53700
AT1G53830
AT1G54010
AT1G54050
AT1G54095
AT1G54100
AT1G54350
AT1G54355
AT1G54500
AT1G54780
AT1G54820
AT1G55020
AT1G55200
AT1G55370
AT1G55390
AT1G55420
AT1G55430
AT1G55480
AT1G55670
AT1G55910
AT1G55990
AT1G56010
AT1G56050
AT1G56120
AT1G56150
AT1G56300
AT1G56320
AT1G56345
AT1G56430
AT1G56500
AT1G56510
AT1G56520
AT1G56660
AT1G56700
AT1G57570
AT1G57590
AT1G57770
AT1G57980
AT1G58030
AT1G58190
AT1G58235
AT1G58270
AT1G58400
AT1G58410
AT1G58561
AT1G58602
AT1G58807
AT1G59780
AT1G59940
AT1G59990
AT1G60000
AT1G60060
AT1G60095
AT1G60110
AT1G60190
AT1G60230
AT1G60260
AT1G60270
AT1G60610
AT1G60630
AT1G60680
AT1G60730
AT1G60740
AT1G60950
AT1G60989
AT1G61050
AT1G61080
AT1G61190
AT1G61360
AT1G61370
AT1G61520
AT1G61590
AT1G61750
AT1G61810
AT1G61860
AT1G62030
AT1G62262
AT1G62370
AT1G62400
AT1G62422
AT1G62440
AT1G62480
AT1G62500
AT1G62610
AT1G62620
AT1G62660
AT1G62710
AT1G62760
AT1G62770
AT1G62960
AT1G63240
AT1G63380
AT1G63410
AT1G63440
AT1G63750
AT1G63840
AT1G63880
AT1G63970
AT1G64110
AT1G64150
AT1G64160
AT1G64170
AT1G64210
AT1G64380
AT1G64460
AT1G64470
AT1G64480
AT1G64500
AT1G64510
AT1G64660
AT1G64780
AT1G64860
AT1G64900
AT1G64970
AT1G65060
AT1G65180
AT1G65190
AT1G65230
AT1G65390
AT1G65500
AT1G65570
AT1G65610
AT1G65900
AT1G65920
AT1G65970
AT1G65985
AT1G66080
AT1G66090
AT1G66130
AT1G66180
AT1G66200
AT1G66280
AT1G66430
AT1G66440
AT1G66450
AT1G66460
AT1G66470
AT1G66600
AT1G66700
AT1G66780
AT1G66800
AT1G66840
AT1G66910
AT1G66920
AT1G66940
AT1G66970
AT1G66980
AT1G67090
AT1G67148
AT1G67150
AT1G67265
AT1G67270
AT1G67330
AT1G67365
AT1G67400
AT1G67700
AT1G67740
AT1G67810
AT1G67830
AT1G67840
AT1G67920
AT1G67940
AT1G68010
AT1G68050
AT1G68150
AT1G68260
AT1G68360
AT1G68400
AT1G68450
AT1G68470
AT1G68520
AT1G68570
AT1G68590
AT1G68600
AT1G68825
AT1G68830
AT1G68850
AT1G68870
AT1G68880
AT1G68890
AT1G69050
AT1G69160
AT1G69200
AT1G69320
AT1G69390
AT1G69410
AT1G69420
AT1G69480
AT1G69490
AT1G69526
AT1G69530
AT1G69570
AT1G69572
AT1G69600
AT1G69700
AT1G69740
AT1G69790
AT1G69810
AT1G69830
AT1G69870
AT1G70140
AT1G70260
AT1G70270
AT1G70420
AT1G70505
AT1G70610
AT1G70710
AT1G70760
AT1G70830
AT1G70850
AT1G70890
AT1G70990
AT1G71380
AT1G71480
AT1G71490
AT1G71500
AT1G71740
AT1G71880
AT1G71890
AT1G72070
AT1G72120
AT1G72140
AT1G72200
AT1G72490
AT1G72520
AT1G72610
AT1G72640
AT1G72680
AT1G72800
AT1G72940
AT1G73110
AT1G73120
AT1G73260
AT1G73300
AT1G73470
AT1G73570
AT1G73630
AT1G73650
AT1G73860
AT1G73965
AT1G74010
AT1G74070
AT1G74430
AT1G74440
AT1G74458
AT1G74460
AT1G74490
AT1G74650
AT1G74670
AT1G74710
AT1G74730
AT1G74840
AT1G74960
AT1G74970
AT1G75010
AT1G75100
AT1G75350
AT1G75390
AT1G75450
AT1G75460
AT1G75520
AT1G75690
AT1G75710
AT1G75730
AT1G75750
AT1G75780
AT1G75820
AT1G75830
AT1G75880
AT1G76080
AT1G76100
AT1G76110
AT1G76180
AT1G76220
AT1G76430
AT1G76450
AT1G76500
AT1G76570
AT1G76680
AT1G76705
AT1G76730
AT1G76760
AT1G76800
AT1G76980
AT1G77000
AT1G77060
AT1G77110
AT1G77145
AT1G77330
AT1G77380
AT1G77390
AT1G77490
AT1G77500
AT1G77590
AT1G77630
AT1G77640
AT1G78000
AT1G78020
AT1G78230
AT1G78370
AT1G78430
AT1G78450
AT1G78460
AT1G78490
AT1G78530
AT1G78580
AT1G78630
AT1G78730
AT1G78820
AT1G78830
AT1G78860
AT1G78865
AT1G78915
AT1G78995
AT1G79040
AT1G79180
AT1G79310
AT1G79320
AT1G79330
AT1G79360
AT1G79450
AT1G79640
AT1G79720
AT1G79790
AT1G79850
AT1G79900
AT1G79910
AT1G80080
AT1G80130
AT1G80160
AT1G80240
AT1G80640
AT1G80690
AT1G80720
AT1G80830
AT1G80880
AT2G01200
AT2G01420
AT2G01520
AT2G01590
AT2G01755
AT2G01760
AT2G01830
AT2G01870
AT2G01880
AT2G01900
AT2G01918
AT2G02020
AT2G02070
AT2G02390
AT2G02450
AT2G02500
AT2G02630
AT2G02680
AT2G02930
AT2G02950
AT2G02980
AT2G03310
AT2G03360
AT2G03710
AT2G03750
AT2G04030
AT2G04038
AT2G04039
AT2G04500
AT2G04530
AT2G04570
AT2G04842
AT2G05070
AT2G05100
AT2G05310
AT2G05510
AT2G05518
AT2G05620
AT2G05910
AT2G06255
AT2G06520
AT2G06925
AT2G06950
AT2G10940
AT2G13580
AT2G13610
AT2G13910
AT2G14060
AT2G14080
AT2G14095
AT2G14100
AT2G14210
AT2G14247
AT2G14510
AT2G14520
AT2G14860
AT2G14878
AT2G14880
AT2G14900
AT2G14960
AT2G15000
AT2G15050
AT2G15080
AT2G15090
AT2G15290
AT2G15400
AT2G15880
AT2G16060
AT2G16270
AT2G16280
AT2G16380
AT2G16430
AT2G16630
AT2G16720
AT2G16740
AT2G16790
AT2G16850
AT2G16890
AT2G16970
AT2G16980
AT2G17240
AT2G17420
AT2G17442
AT2G17500
AT2G17710
AT2G17780
AT2G17880
AT2G17972
AT2G18010
AT2G18050
AT2G18150
AT2G18350
AT2G18500
AT2G18690
AT2G18890
AT2G18950
AT2G18969
AT2G18970
AT2G19130
AT2G19310
AT2G19400
AT2G19572
AT2G19660
AT2G19810
AT2G19900
AT2G19970
AT2G20030
AT2G20080
AT2G20120
AT2G20250
AT2G20260
AT2G20340
AT2G20520
AT2G20570
AT2G20585
AT2G20670
AT2G20875
AT2G20890
AT2G21020
AT2G21080
AT2G21210
AT2G21220
AT2G21320
AT2G21330
AT2G21340
AT2G21370
AT2G21385
AT2G21510
AT2G21530
AT2G21550
AT2G21590
AT2G21640
AT2G21660
AT2G21820
AT2G21840
AT2G21850
AT2G21910
AT2G22190
AT2G22230
AT2G22330
AT2G22470
AT2G22510
AT2G22540
AT2G22560
AT2G22570
AT2G22660
AT2G22680
AT2G22821
AT2G22860
AT2G22880
AT2G23030
AT2G23130
AT2G23180
AT2G23540
AT2G23600
AT2G23620
AT2G23670
AT2G23672
AT2G23690
AT2G23840
AT2G23910
AT2G24020
AT2G24090
AT2G24130
AT2G24140
AT2G24160
AT2G24220
AT2G24260
AT2G24300
AT2G24600
AT2G24645
AT2G24700
AT2G24710
AT2G24762
AT2G24800
AT2G24860
AT2G25000
AT2G25080
AT2G25160
AT2G25410
AT2G25480
AT2G25605
AT2G25840
AT2G25890
AT2G25940
AT2G26070
AT2G26215
AT2G26290
AT2G26340
AT2G26355
AT2G26390
AT2G26400
AT2G26410
AT2G26530
AT2G26540
AT2G26580
AT2G26710
AT2G26820
AT2G26900
AT2G26930
AT2G26975
AT2G27000
AT2G27010
AT2G27290
AT2G27310
AT2G27370
AT2G27380
AT2G27402
AT2G27430
AT2G27660
AT2G27770
AT2G27930
AT2G28110
AT2G28140
AT2G28190
AT2G28200
AT2G28270
AT2G28400
AT2G28410
AT2G28560
AT2G28570
AT2G28605
AT2G28630
AT2G28671
AT2G28690
AT2G28780
AT2G28870
AT2G28900
AT2G28930
AT2G28950
AT2G28990
AT2G29060
AT2G29290
AT2G29300
AT2G29320
AT2G29360
AT2G29470
AT2G29480
AT2G29620
AT2G29650
AT2G29670
AT2G29740
AT2G29940
AT2G29950
AT2G30010
AT2G30200
AT2G30320
AT2G30360
AT2G30362
AT2G30390
AT2G30420
AT2G30520
AT2G30540
AT2G30550
AT2G30570
AT2G30660
AT2G30695
AT2G30750
AT2G30790
AT2G30840
AT2G30950
AT2G31040
AT2G31070
AT2G31081
AT2G31082
AT2G31083
AT2G31085
AT2G31170
AT2G31180
AT2G31560
AT2G31585
AT2G31930
AT2G31945
AT2G31980
AT2G32010
AT2G32100
AT2G32140
AT2G32160
AT2G32240
AT2G32270
AT2G32280
AT2G32300
AT2G32430
AT2G32460
AT2G32500
AT2G32540
AT2G32610
AT2G32620
AT2G32640
AT2G32660
AT2G32690
AT2G32860
AT2G32870
AT2G32880
AT2G33180
AT2G33330
AT2G33380
AT2G33450
AT2G33550
AT2G33630
AT2G33855
AT2G33860
AT2G34010
AT2G34020
AT2G34060
AT2G34090
AT2G34170
AT2G34180
AT2G34340
AT2G34350
AT2G34390
AT2G34420
AT2G34430
AT2G34460
AT2G34490
AT2G34500
AT2G34510
AT2G34600
AT2G34610
AT2G34620
AT2G34810
AT2G34940
AT2G35140
AT2G35170
AT2G35210
AT2G35260
AT2G35380
AT2G35390
AT2G35410
AT2G35450
AT2G35500
AT2G35585
AT2G35660
AT2G35730
AT2G35770
AT2G35810
AT2G35820
AT2G35830
AT2G35960
AT2G35980
AT2G36080
AT2G36090
AT2G36100
AT2G36120
AT2G36145
AT2G36250
AT2G36270
AT2G36320
AT2G36390
AT2G36890
AT2G37030
AT2G37130
AT2G37240
AT2G37280
AT2G37290
AT2G37380
AT2G37390
AT2G37510
AT2G37660
AT2G37670
AT2G37678
AT2G37750
AT2G37790
AT2G37870
AT2G37920
AT2G38110
AT2G38140
AT2G38240
AT2G38330
AT2G38400
AT2G38460
AT2G38465
AT2G38500
AT2G38530
AT2G38540
AT2G38790
AT2G38830
AT2G38920
AT2G39010
AT2G39110
AT2G39210
AT2G39220
AT2G39250
AT2G39350
AT2G39370
AT2G39400
AT2G39410
AT2G39430
AT2G39470
AT2G39530
AT2G39690
AT2G39700
AT2G39705
AT2G39730
AT2G39800
AT2G39850
AT2G39980
AT2G40020
AT2G40080
AT2G40110
AT2G40113
AT2G40230
AT2G40370
AT2G40460
AT2G40470
AT2G40490
AT2G40520
AT2G40670
AT2G40690
AT2G40940
AT2G41070
AT2G41090
AT2G41170
AT2G41230
AT2G41231
AT2G41260
AT2G41312
AT2G41340
AT2G41780
AT2G41850
AT2G41890
AT2G41905
AT2G41940
AT2G42010
AT2G42060
AT2G42130
AT2G42170
AT2G42200
AT2G42220
AT2G42380
AT2G42430
AT2G42570
AT2G42600
AT2G42610
AT2G42690
AT2G42770
AT2G42800
AT2G42850
AT2G42975
AT2G43010
AT2G43050
AT2G43060
AT2G43520
AT2G43530
AT2G43535
AT2G43550
AT2G43560
AT2G43590
AT2G43620
AT2G43800
AT2G43830
AT2G43910
AT2G43920
AT2G43945
AT2G44080
AT2G44210
AT2G44230
AT2G44280
AT2G44380
AT2G44570
AT2G44630
AT2G44790
AT2G44920
AT2G45120
AT2G45150
AT2G45180
AT2G45190
AT2G45210
AT2G45220
AT2G45510
AT2G45660
AT2G45900
AT2G46070
AT2G46110
AT2G46140
AT2G46160
AT2G46210
AT2G46250
AT2G46380
AT2G46450
AT2G46510
AT2G46640
AT2G46650
AT2G46680
AT2G46720
AT2G46750
AT2G46820
AT2G46940
AT2G46950
AT2G46970
AT2G46990
AT2G47000
AT2G47010
AT2G47160
AT2G47180
AT2G47240
AT2G47270
AT2G47450
AT2G47560
AT2G47590
AT2G47600
AT2G47780
AT2G47940
AT2G48070
AT2G48120
AT2G48130
AT2G48140
AT3G01060
AT3G01190
AT3G01220
AT3G01260
AT3G01290
AT3G01440
AT3G01450
AT3G01480
AT3G01490
AT3G01500
AT3G01510
AT3G01516
AT3G01810
AT3G01970
AT3G02140
AT3G02150
AT3G02240
AT3G02380
AT3G02620
AT3G02640
AT3G02670
AT3G02730
AT3G02830
AT3G02870
AT3G02990
AT3G03150
AT3G03170
AT3G03240
AT3G03280
AT3G03500
AT3G03660
AT3G03770
AT3G03780
AT3G03980
AT3G04010
AT3G04060
AT3G04070
AT3G04290
AT3G04420
AT3G04485
AT3G04530
AT3G04550
AT3G04720
AT3G04760
AT3G04790
AT3G05140
AT3G05150
AT3G05180
AT3G05345
AT3G05600
AT3G05620
AT3G05625
AT3G05690
AT3G05730
AT3G05750
AT3G05800
AT3G05890
AT3G05920
AT3G05937
AT3G05950
AT3G06140
AT3G06145
AT3G06390
AT3G06778
AT3G06840
AT3G06880
AT3G06950
AT3G07195
AT3G07380
AT3G07440
AT3G07540
AT3G07600
AT3G07770
AT3G07900
AT3G08030
AT3G08040
AT3G08600
AT3G08660
AT3G08770
AT3G08860
AT3G08920
AT3G08940
AT3G09020
AT3G09050
AT3G09160
AT3G09162
AT3G09190
AT3G09240
AT3G09490
AT3G09580
AT3G09790
AT3G09800
AT3G09960
AT3G10060
AT3G10080
AT3G10110
AT3G10200
AT3G10290
AT3G10320
AT3G10450
AT3G10520
AT3G10570
AT3G10840
AT3G10870
AT3G10985
AT3G11080
AT3G11090
AT3G11150
AT3G11340
AT3G11370
AT3G11430
AT3G11550
AT3G11630
AT3G11670
AT3G11945
AT3G12040
AT3G12145
AT3G12203
AT3G12220
AT3G12345
AT3G12780
AT3G12820
AT3G12930
AT3G13000
AT3G13090
AT3G13120
AT3G13270
AT3G13400
AT3G13470
AT3G13760
AT3G13960
AT3G14185
AT3G14210
AT3G14225
AT3G14230
AT3G14260
AT3G14280
AT3G14360
AT3G14362
AT3G14370
AT3G14390
AT3G14420
AT3G14450
AT3G14590
AT3G14610
AT3G14680
AT3G14740
AT3G14760
AT3G14810
AT3G14890
AT3G14930
AT3G15030
AT3G15110
AT3G15190
AT3G15360
AT3G15500
AT3G15510
AT3G15520
AT3G15540
AT3G15570
AT3G15620
AT3G15670
AT3G15680
AT3G15840
AT3G15850
AT3G16000
AT3G16010
AT3G16120
AT3G16140
AT3G16210
AT3G16340
AT3G16490
AT3G16520
AT3G16530
AT3G16660
AT3G16670
AT3G16770
AT3G16900
AT3G17040
AT3G17050
AT3G17110
AT3G17350
AT3G17580
AT3G17640
AT3G18010
AT3G18050
AT3G18070
AT3G18080
AT3G18090
AT3G18280
AT3G18400
AT3G18490
AT3G18530
AT3G18535
AT3G18850
AT3G18890
AT3G18900
AT3G19020
AT3G19100
AT3G19200
AT3G19390
AT3G19440
AT3G19480
AT3G19580
AT3G19620
AT3G19660
AT3G19720
AT3G19850
AT3G19920
AT3G20250
AT3G20340
AT3G20370
AT3G20380
AT3G20395
AT3G20420
AT3G20440
AT3G20460
AT3G20470
AT3G20770
AT3G20865
AT3G20898
AT3G20900
AT3G20940
AT3G20960
AT3G21055
AT3G21090
AT3G21250
AT3G21270
AT3G21340
AT3G21352
AT3G21420
AT3G21460
AT3G21670
AT3G21720
AT3G21750
AT3G21760
AT3G21770
AT3G21950
AT3G22060
AT3G22120
AT3G22121
AT3G22142
AT3G22235
AT3G22240
AT3G22410
AT3G22420
AT3G22570
AT3G22740
AT3G22760
AT3G22800
AT3G22840
AT3G22886
AT3G23090
AT3G23150
AT3G23175
AT3G23180
AT3G23190
AT3G23240
AT3G23290
AT3G23400
AT3G23410
AT3G23470
AT3G23510
AT3G23550
AT3G23560
AT3G23630
AT3G23635
AT3G23790
AT3G23800
AT3G23805
AT3G23840
AT3G23870
AT3G23880
AT3G23930
AT3G24020
AT3G24140
AT3G24210
AT3G24300
AT3G24310
AT3G24420
AT3G24450
AT3G24650
AT3G24715
AT3G24770
AT3G25130
AT3G25190
AT3G25510
AT3G25717
AT3G25730
AT3G25760
AT3G25882
AT3G25900
AT3G25905
AT3G25920
AT3G25950
AT3G26040
AT3G26060
AT3G26100
AT3G26130
AT3G26170
AT3G26290
AT3G26440
AT3G26490
AT3G26500
AT3G26550
AT3G26570
AT3G26710
AT3G26740
AT3G27070
AT3G27150
AT3G27160
AT3G27210
AT3G27400
AT3G27440
AT3G27500
AT3G27510
AT3G27650
AT3G27690
AT3G27830
AT3G27925
AT3G27950
AT3G28040
AT3G28070
AT3G28080
AT3G28100
AT3G28130
AT3G28160
AT3G28340
AT3G28345
AT3G28460
AT3G28510
AT3G28760
AT3G28770
AT3G28857
AT3G28930
AT3G28945
AT3G28960
AT3G29030
AT3G29034
AT3G29035
AT3G29185
AT3G29250
AT3G29320
AT3G29410
AT3G29575
AT3G29639
AT3G29680
AT3G29810
AT3G29970
AT3G30390
AT3G32040
AT3G32925
AT3G32930
AT3G32980
AT3G41762
AT3G42658
AT3G43430
AT3G43540
AT3G44020
AT3G44300
AT3G44510
AT3G44550
AT3G44620
AT3G44630
AT3G44700
AT3G44770
AT3G44890
AT3G44970
AT3G45050
AT3G45130
AT3G45160
AT3G45260
AT3G45280
AT3G45300
AT3G45310
AT3G45430
AT3G45440
AT3G45530
AT3G45700
AT3G45730
AT3G45840
AT3G45960
AT3G46110
AT3G46270
AT3G46280
AT3G46330
AT3G46490
AT3G46500
AT3G46530
AT3G46540
AT3G46550
AT3G46630
AT3G46690
AT3G46700
AT3G46710
AT3G46730
AT3G46780
AT3G46900
AT3G46970
AT3G47010
AT3G47040
AT3G47050
AT3G47070
AT3G47200
AT3G47210
AT3G47220
AT3G47250
AT3G47290
AT3G47450
AT3G47470
AT3G47490
AT3G47500
AT3G47510
AT3G47860
AT3G47875
AT3G47980
AT3G48020
AT3G48080
AT3G48260
AT3G48280
AT3G48350
AT3G48400
AT3G48420
AT3G48425
AT3G48450
AT3G48490
AT3G48510
AT3G48520
AT3G48600
AT3G48720
AT3G48730
AT3G48920
AT3G48940
AT3G48970
AT3G49120
AT3G49160
AT3G49210
AT3G49260
AT3G49350
AT3G49360
AT3G49380
AT3G49670
AT3G49820
AT3G49830
AT3G49845
AT3G49860
AT3G50030
AT3G50060
AT3G50100
AT3G50240
AT3G50260
AT3G50270
AT3G50280
AT3G50330
AT3G50400
AT3G50460
AT3G50570
AT3G50685
AT3G50750
AT3G50770
AT3G50790
AT3G50810
AT3G50820
AT3G50970
AT3G50980
AT3G51060
AT3G51220
AT3G51230
AT3G51240
AT3G51290
AT3G51330
AT3G51340
AT3G51360
AT3G51400
AT3G51410
AT3G51440
AT3G51510
AT3G51540
AT3G51600
AT3G51760
AT3G51820
AT3G51890
AT3G52150
AT3G52170
AT3G52180
AT3G52290
AT3G52380
AT3G52480
AT3G52500
AT3G52525
AT3G52561
AT3G52720
AT3G52750
AT3G52780
AT3G52910
AT3G52960
AT3G53170
AT3G53190
AT3G53200
AT3G53232
AT3G53250
AT3G53380
AT3G53470
AT3G53480
AT3G53540
AT3G53560
AT3G53680
AT3G53720
AT3G53800
AT3G53830
AT3G53840
AT3G53900
AT3G53960
AT3G54000
AT3G54040
AT3G54050
AT3G54090
AT3G54150
AT3G54210
AT3G54363
AT3G54400
AT3G54460
AT3G54510
AT3G54520
AT3G54680
AT3G54770
AT3G54820
AT3G54890
AT3G54900
AT3G54910
AT3G55040
AT3G55090
AT3G55120
AT3G55230
AT3G55240
AT3G55330
AT3G55500
AT3G55720
AT3G55760
AT3G55800
AT3G55890
AT3G55900
AT3G55940
AT3G56010
AT3G56040
AT3G56060
AT3G56080
AT3G56160
AT3G56230
AT3G56290
AT3G56300
AT3G56310
AT3G56330
AT3G56350
AT3G56400
AT3G56570
AT3G56650
AT3G56891
AT3G56910
AT3G56940
AT3G56970
AT3G57020
AT3G57030
AT3G57130
AT3G57380
AT3G57550
AT3G57600
AT3G57830
AT3G58140
AT3G58200
AT3G58690
AT3G58710
AT3G58820
AT3G58850
AT3G58940
AT3G59220
AT3G59250
AT3G59340
AT3G59370
AT3G59400
AT3G59690
AT3G59695
AT3G59700
AT3G59780
AT3G59900
AT3G60070
AT3G60140
AT3G60160
AT3G60490
AT3G60520
AT3G60530
AT3G60540
AT3G60550
AT3G60580
AT3G60930
AT3G61060
AT3G61190
AT3G61198
AT3G61220
AT3G61250
AT3G61270
AT3G61310
AT3G61430
AT3G61470
AT3G61550
AT3G61680
AT3G61750
AT3G61820
AT3G61870
AT3G61900
AT3G61950
AT3G61970
AT3G62030
AT3G62090
AT3G62110
AT3G62150
AT3G62260
AT3G62270
AT3G62410
AT3G62550
AT3G62630
AT3G62750
AT3G62780
AT3G62820
AT3G62930
AT3G62950
AT3G63010
AT3G63140
AT3G63160
AT3G63190
AT3G63370
AT3G63410
AT3G63450
AT3G63470
AT3G63510
AT3G63540
AT4G00050
AT4G00380
AT4G00430
AT4G00480
AT4G00700
AT4G00750
AT4G00780
AT4G00880
AT4G00940
AT4G00950
AT4G01050
AT4G01060
AT4G01110
AT4G01130
AT4G01140
AT4G01150
AT4G01335
AT4G01350
AT4G01360
[truncated: 1,292 more rows]

## Sheet: Genes encoding ZFP6 BFs
Supplemental Table S2. Analysis of genes that codify for proteins that may bind to ZFP6 and ZFPH genes
Genes Encoding ZFP6 Binding Factors (BFs)
Gene ID	Symbol	Function
AT2G22430	ATHB6	Encodes a homeodomain leucine zipper class I (HD-Zip I) protein that is a target of the protein phosphatase ABI1 and regulates hormone responses in Arabidopsis.
AT2G46270	GBF3	Encodes a bZIP G-box binding protein whose expression is induced by ABA. It has been shown to bind to Adh that contains the G-box
AT2G46680	ATHB7	Encodes a putative transcription factor that contains a homeodomain closely linked to a leucine zipper motif. Transcript is detected in all tissues examined. Is transcriptionally regulated in an ABA-dependent manner and may act in a signal transduction pathway which mediates a drought response.
AT3G19290	ABF4	bZIP transcription factor with specificity for abscisic acid-responsive elements (ABRE). Mediates ABA-dependent stress responses.ABF4 acts through SnRK2 pathway and binds to ABA response elements of the promoters of NYE1 and regulates their expression to promote chlorophyll degradation
AT4G01120	ATBZIP54	bZIP (basic leucine zipper) transcription factor that binds to the G-box regulatory element found in many plant promoters. GBF2 nuclear localization is increased by blue light
AT4G34000	ABF3	Encodes an ABA-responsive element-binding protein with similarity to transcription factors that is expressed in response to stress and abscisic acid.
AT4G37790	HAT22	Encodes homeobox protein HAT22, member of the HD-Zip II family. The mRNA is cell-to-cell mobile.
AT5G65310	ATHB5	Encodes a class I HDZip (homeodomain-leucine zipper) protein that is a positive regulator of ABA-responsiveness, mediating the inhibitory effect of ABA on growth during seedling establishment.
AT5G67300	ATMYB44	Member of the R2R3 factor MYB gene family involved in mediating plant responses to a variety of abiotic stimiuli. The mRNA is cell-to-cell mobile

## Sheet: Genes encoding ZFPH BFs
Supplemental Table S2. Analysis of genes that codify for proteins that may bind to ZFP6 and ZFPH genes
Genes Encoding ZFPH Binding Factors (BFs)
Gene ID	Symbol	Function
AT1G22640	ATMYB3	MYB-type transcription factor (MYB3) that represses phenylpropanoid biosynthesis gene expression
AT1G24260	AGL9	AT1G24260Member of the MADs box transcription factor family. SEP3 is redundant with SEP1 and 2. Flowers of SEP1/2/3 triple mutants show a conversion of petals and stamens to sepals.SEP3 forms heterotetrameric complexes with other MADS box family members and binds to the CArG box motif.
AT2G22430	ATHB6	Encodes a homeodomain leucine zipper class I (HD-Zip I) protein that is a target of the protein phosphatase ABI1 and regulates hormone responses in Arabidopsis.
AT2G43010	AtPIF4	Isolated as a semidominant mutation defective in red -light responses. Encodes a nuclear localized bHLH protein that interacts with active PhyB protein. Negatively regulates phyB mediated red light responses. Involved in shade avoidance response. Protein abundance is negatively regulated by PhyB.Involved in the regulation of response to nutrient levels. Controls the resistance to B. cinerea in a …
AT2G46270	GBF3	encodes a bZIP G-box binding protein whose expression is induced by ABA. It has been shown to bind to Adh that contains the G-box and is induced by cold and water deprivation. GBF3 has been shown to be expressed mostly in the root and dark-grown leaves. GBF3 can act as homodimers and as heterodimers with GFB1, GBF2 and GBF4. In addition, GBF3¡¯s DNA binding activity is enhanced by GIP1, GPRI1 and…
AT2G46680	ATHB7	encodes a putative transcription factor that contains a homeodomain closely linked to a leucine zipper motif. Transcript is detected in all tissues examined. Is transcriptionally regulated in an ABA-dependent manner and may act in a signal transduction pathway which mediates a drought response.
AT3G19290	ABF4	bZIP transcription factor with specificity for abscisic acid-responsive elements (ABRE). Mediates ABA-dependent stress responses.ABF4 acts through SnRK2 pathway and binds to ABA response elements of the promoters of NYE1 and regulates their expression to promote chlorophyll degradation.
AT4G01120	ATBZIP54	bZIP (basic leucine zipper) transcription factor that binds to the G-box regulatory element found in many plant promoters. GBF2 nuclear localization is increased by blue light
AT4G34000	ABF3	Encodes an ABA-responsive element-binding protein with similarity to transcription factors that is expressed in response to stress and abscisic acid.
AT4G37790	HAT22	Encodes homeobox protein HAT22, member of the HD-Zip II family. The mRNA is cell-to-cell mobile
AT5G07310	ERF115	encodes a member of the ERF (ethylene response factor) subfamily B-4 of ERF/AP2 transcription factor family. The protein contains one AP2 domain. There are 7 members in this subfamily. Cytokinin production induced by jasmonate represses adventitious rooting.
AT5G13790	AGL15	AGL15 (AGAMOUS-Like 15) is a member of the MADS domain family of regulatory factors. Although AGL15 is preferentially expressed during embryogenesis, AGL15 is also expressed in leaf primordia, shoot apical meristems and young floral buds, suggesting that AGL15 may play a role during post-germinative development. Transgenic plants that ectopically express AGL15 show delays in the transition to flo…
AT5G20240	PI	Floral homeotic gene encoding a MADS domain transcription factor. Required for the specification of petal and stamen identities.
AT5G24470	APRR5	Encodes a pseudo-response regulator whose mutation affects various circadian-associated biological events such as flowering time in the long-day photoperiod conditions, red light sensitivity of seedlings during early photomorphogenesis, and the period of free-running rhythms of certain clock-controlled genes including CCA1 and APRR1/TOC1 in constant white light. Acts as transcriptional repressor …
AT5G61850	LFY	Encodes transcriptional regulator that promotes the transition to flowering.Involved in floral meristem development. LFY is involved in the regulation of AP3 expression, and appears to bring the F-box protein UFO to the AP3 promoter. Amino acids 46-120 define a protein domain that mediates self-interaction
AT5G65310	ATHB5	Encodes a class I HDZip (homeodomain-leucine zipper) protein that is a positive regulator of ABA-responsiveness, mediating the inhibitory effect of ABA on growth during seedling establishment.
AT5G67300	ATMYB44	Member of the R2R3 factor MYB gene family involved in mediating plant responses to a variety of abiotic stimiuli. The mRNA is cell-to-cell mobile.

## Sheet: Genes Bound by ZFP6
Supplemental Table S2. Analysis of genes that codify for proteins that may bind to ZFP6 and ZFPH genes
Genes Bound by ZFP6
Gene ID	Symbol
None identified

## Sheet: Genes Bound by ZFPH
Supplemental Table S2. Analysis of genes that codify for proteins that may bind to ZFP6 and ZFPH genes
Genes Bound by ZFPH
Gene ID	Symbol	Function
AT5G12870	ATMYB46	Encodes MYB46, member of the R2R3 factor gene family. Modulates Disease Susceptibility to Botrytis cinerea.
AT5G23010	IMS3	Encodes a methylthioalkylmalate synthase, catalyzes the condensation reactions of the first two rounds of methionine chain elongation in the biosynthesis of methionine-derived glucosinolates. The mRNA is cell-to-cell mobile.
